# Supplementary material
Source: PubMed Central journal article supplement (PMC3078441)
Supplement: mmc1.pdf [file mmc1.pdf]

**Supplemental Table 1. Patients with Sweet's Syndrome (SW) or pyoderma gangrenosum (PG)**

| Patient | Sex, Age | Location                                      | Associated Diseases                                                                                                                                          |
|---------|----------|-----------------------------------------------|--------------------------------------------------------------------------------------------------------------------------------------------------------------|
| SW1     | M, 11    | trunk, extremities, face                      | Neonatal onset, has had arthritis, mouth ulcers, recurrent fevers. Similarly affected brother died age 4 with pulmonary hypertension and diffuse vasculitis. |
| SW2     | M, 66    | hands, back, arms, chest, abdomen, knees      | Thymus cancer in 2003                                                                                                                                        |
| SW3     | F, 56    | both lateral forearms, shoulders              | UC, DM, Hypothyroidism, HTN                                                                                                                                  |
| SW4     | M, 34    | trunk, extremities, neck line                 | DM-II, migratory polyarthralgia                                                                                                                              |
| SW5     | F, 55    | head, neck, back, chest, abdomen, extremities | diverticulitis, pyelonephritis                                                                                                                               |
| SW6     | F, 43    | arms, legs, feet                              | chronic diarrhea, IBS(?)                                                                                                                                     |
| SW7     | F, 54    | no data                                       | no data                                                                                                                                                      |
| SW8     | F, 58    | face, scalp, abdomen, back                    | Multiple myeloma, seborrheic keratoses                                                                                                                       |

| Patient | Gender, Age | PG Form | Location | Associated Diseases               |
|---------|-------------|---------|----------|-----------------------------------|
| PG1     | F, 52       | C       | LE       | DM                                |
| PG2     | M, 64       | P       | PST      | UC, DMII                          |
| PG3     | F, 31       | C       | LE       | positive ACA screen               |
| PG4     | F, 57       | C       | LE       | Hepatitis C, rheumatoid arthritis |
| PG5     | M, 59       | C       | LE       | Rectal fistula in 1960s           |
| PG6     | F, 56       | C       | LE       | Hepatitis in 1972                 |
| PG7     | F, 59       | C       | LE       | Rheumatoid arthritis              |
| PG8     | M, 51       | C       | LE       | DM                                |
| PG9     | F, 56       | C       | LE       | Autoimmune cholangiopathy         |
| PG10    | F, 61       | C       | LE       | UC, DMII                          |
| PG11    | M, 22       | C       | LE       | DMI, Macrocytosis                 |
| PG12    | F, 70       | C       | LE       | Monoclonal gammopathy             |
| PG13    | F, 47       | V       | ABD      | none                              |
| PG14    | F, 93       | A       | CBS      | Asthma, GERD, Osteoarthritis      |

Abbreviations: M, male; F, female; C, classic form of PG; P, peristomal form; V, vegetative form; A, atypical form; LE, low extremity; PST, peristomal; ABD, abdomen; CBS, chest, breast, arm, back and scalp; UC, ulcerative colitis; DM, diabetes mellitus; HTN, hypertension; IBS, irritable bowel syndrome; ACA, Anti-Cardiolipin Antibody; GERD, gastroesophageal reflux disease.
