# Supplementary material
Source: PubMed Central journal article supplement (PMC3078441)
Supplement: mmc2.pdf [file mmc2.pdf]

## Supplemental Table 2

### PROTEIN PTPN6 ANTIBODIES

([ENSP00000326010](#), 595AA)

1aa (exon 1B)

50

| ↗ exon 2-3 (SH2-N domain) **GS** |  
 MV**RWFHRDLSGLDAETLLKGRGVHGSFLARPSRKNQGDFSLSVRVGDQVT**

**HIRIQNSGDFYDLYGGEKFATLTELVEYYTQQQGVLQDRDGTIIHLKYPL**

↗ exon 4-5 (SH2-C domain)

**NCSDPTSERWYHGHMSGGQAETLLQAKGEPWTFVLVRESLSQPGDFVLSVL**

**SDQPKAGPGSPLRVTHIKVMCEGGRYTVGGLETFDLSLTDLVEHFKKTGIE**

NDLD mutation ↗

**EASGAFVYLRQPYYATRVNAADIENRVLELNKKQES** **EDTAKAGFWEEFS**

exon 7-13 (PTPase domain)

**LQKQEVKNLHQRLLEGQRPENKGNRYKNILPFDHSRVILQGRDSNIPGSD**

ab2020

**YINANYIKNQLLGPDENAKTYIASQGCLEATVNDFWQMAWQENSRVIVMT**

H-65

**TREVEKGRNKCVPYWPEVGMQRAYGPYSVTNCGEHDTEYKLRRTLQVSPL**

**DNGDLIREIWHYQYLSWPDHGVPSSEPGGVLSFLDQINQRQESLPHAGPII**

**VHCSAGIGRTGTIIVIDMLMENISTKGLDCDIDIQKTIQMVRAQRSGMVQ**

**TEAQYKFIYVAIAQFIEITKKKLEVLQSQKGQESEYGNITYPPAMKNAHA**

EV

**KASRTSSKHKE**DVYENLHTKNKREEKVKKQRSADKEKSKGSLKRK

| ID                | Immunogen                   | Peptide                  | Isotype         | References                     |
|-------------------|-----------------------------|--------------------------|-----------------|--------------------------------|
| <b>GS</b>         | SH2-N (Mouse)               | RGVPGSFLARPSRKNQG-C      | Rabbit IgG      | GenScript*                     |
| <b>ab2020</b>     | PTPase domain (Human)       | KNQLLGPDENAK (308-319aa) | Rabbit IgG      | <a href="#">Abcam</a>          |
| <b>H-65</b>       | PTPase domain (Human)       | 356-420aa                | Rabbit IgG      | <a href="#">Santa Cruz</a>     |
| <b>EV</b>         | C-tail (Mouse)              | C-KASRTSSKHKEE           | Goat IgG        | <a href="#">Everest</a>        |
| <b>C-19 (HRP)</b> | C-terminus (Human)          | no data available        | Rabbit IgG      | <a href="#">Santa Cruz</a>     |
| <b>BD</b>         | C-terminus (Human)          | 492-595aa                | Mouse IgG1      | <a href="#">BD Biosciences</a> |
| <b>PTY6</b>       | Full length protein (Human) |                          | Mouse IgG1      | <a href="#">GeneTex</a>        |
| <b>PTY10</b>      | Full length protein (Human) |                          | Mouse IgG2a     | <a href="#">GeneTex</a>        |
| <b>AV</b>         | Full length protein (Human) |                          | Mouse polyclon. | Abnova*                        |

\* - custom

Human PTPN6 protein sequence and antibodies used for detection. SH2<sub>N</sub>, SH2<sub>C</sub> and PTPase domains are in bold and underlined. Peptide sequences identical in human and mouse are highlighted in yellow. Amino acids that differ between human and mouse are highlighted in blue.
